# Supplementary material
Source: Springer Nature journal article supplement (https://www.springermedizin.de/resource/supplementary/12885_2014_4618_MOESM3_ESM.pdf/9466836)

**A**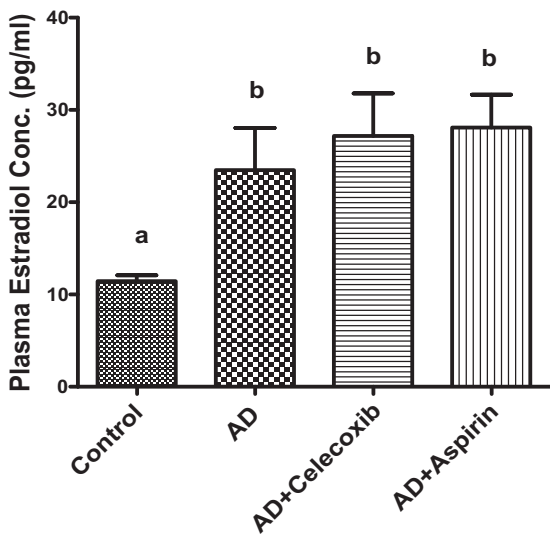**B**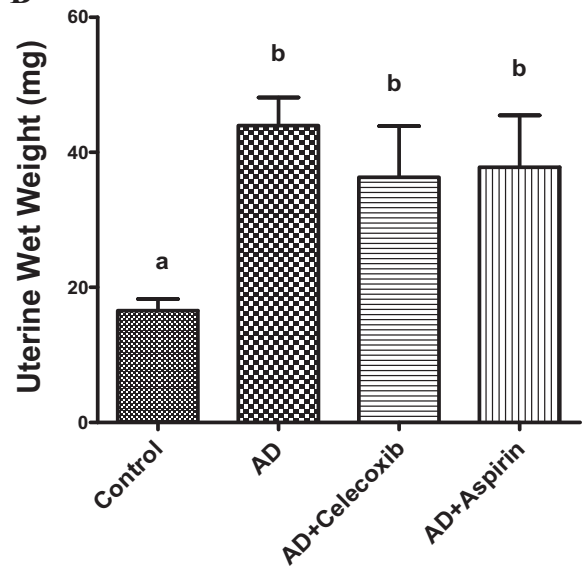**C**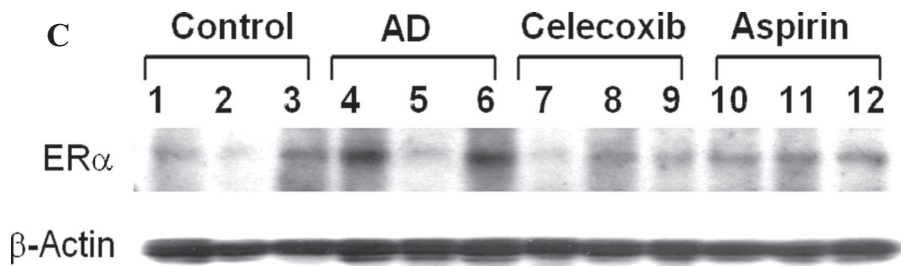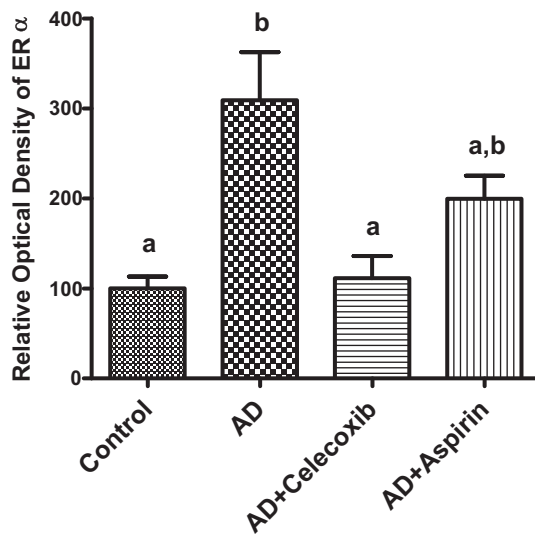

Supplement: MOESM3 [file 9466836]
